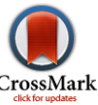

# Serological Evidence of Henipavirus Exposure in Cattle, Goats and Pigs in Bangladesh

Sukanta Chowdhury<sup>1\*</sup>, Salah Uddin Khan<sup>1</sup>, Gary Crameri<sup>2</sup>, Jonathan H. Epstein<sup>3</sup>, Christopher C. Broder<sup>4</sup>, Ausraful Islam<sup>1</sup>, Alison J. Peel<sup>5</sup>, Jennifer Barr<sup>2</sup>, Peter Daszak<sup>3</sup>, Lin-Fa Wang<sup>2,6</sup>, Stephen P. Luby<sup>1,7</sup>

**1** International Centre for Diarrheal Diseases Research, Bangladesh (icddr, b), Dhaka, Bangladesh, **2** CSIRO Australian Animal Health Laboratory (AAHL), Geelong, Victoria, Australia, **3** EcoHealth Alliance, New York, New York, United States of America, **4** Uniformed Services University, Bethesda, Maryland, United States of America, **5** Environmental Futures Research Institute, Griffith University, Nathan, Queensland, Australia, **6** Program in Emerging Infectious Diseases, Duke-NUS Graduate Medical School, Singapore, **7** Stanford University, Stanford, California, United States of America

## Abstract

**Background:** Nipah virus (NiV) is an emerging disease that causes severe encephalitis and respiratory illness in humans. Pigs were identified as an intermediate host for NiV transmission in Malaysia. In Bangladesh, NiV has caused recognized human outbreaks since 2001 and three outbreak investigations identified an epidemiological association between close contact with sick or dead animals and human illness.

**Methodology:** We examined cattle and goats reared around *Pteropus* bat roosts in human NiV outbreak areas. We also tested pig sera collected under another study focused on Japanese encephalitis.

**Principal Findings:** We detected antibodies against NiV glycoprotein in 26 (6.5%) cattle, 17 (4.3%) goats and 138 (44.2%) pigs by a Luminex-based multiplexed microsphere assay; however, these antibodies did not neutralize NiV. Cattle and goats with NiVsG antibodies were more likely to have a history of feeding on fruits partially eaten by bats or birds (PR = 3.1, 95% CI 1.6–5.7) and drinking palmyra palm juice (PR = 3.9, 95% CI 1.5–10.2).

**Conclusions:** This difference in test results may be due to the exposure of animals to one or more novel viruses with antigenic similarity to NiV. Further research may identify a novel organism of public health importance.

**Citation:** Chowdhury S, Khan SU, Crameri G, Epstein JH, Broder CC, et al. (2014) Serological Evidence of Henipavirus Exposure in Cattle, Goats and Pigs in Bangladesh. *PLoS Negl Trop Dis* 8(11): e3302. doi:10.1371/journal.pntd.0003302

**Editor:** Thomas Geisbert, University of Texas Medical Branch, United States of America

**Received:** March 27, 2014; **Accepted:** September 29, 2014; **Published:** November 20, 2014

**Copyright:** © 2014 Chowdhury et al. This is an open-access article distributed under the terms of the Creative Commons Attribution License, which permits unrestricted use, distribution, and reproduction in any medium, provided the original author and source are credited.

**Data Availability:** The authors confirm that all data underlying the findings are fully available without restriction. All relevant data are within the paper and its Supporting Information files.

**Funding:** This research was funded by US National Institutes of Health (NIH), grant NIH/NSF EID 2R01TW005869. The funders had no role in the study design, data collection and analysis, decision to publish, or preparation of the manuscript.

**Competing Interests:** The authors have declared that no competing interests exist.

\* Email: sukanta@icddr.org

## Introduction

Nipah virus (NiV) is a zoonotic paramyxovirus whose reservoir host is fruit bats of the genus *Pteropus* [1–3]. NiV was first recognized in a large outbreak in Malaysia where pigs were an intermediate host for the transmission of NiV infection in humans [4,5]. Outbreak investigators speculated that pigs were infected with NiV by ingesting partially eaten saliva-contaminated fruit dropped by *Pteropus* bats [6]. Pig farmers were more likely to be infected with NiV suggesting infected pigs transmitted NiV to humans through close contact [7]. Between 2001 and 2013 NiV has caused 227 recognized human infections in Bangladesh with a case fatality of over 75% [8–15]. Although there is no serological or microbiological confirmation of NiV infection in domestic animals in Bangladesh, three outbreak investigations have identified suggestive associations between domestic animals and human infection. In the 2001 outbreak in Meherpur, Bangladesh, human Nipah cases were 7.9 times more likely than controls to have contact with a sick cow (odds ratio[OR] 7.9, 95% confidence interval [CI] 2.2–27.7) [8]. In a 2004 outbreak, a NiV-infected

child had a close contact history with two sick goats and in a 2003 human Nipah outbreak at Naogaon, Bangladesh, cases were more likely than controls to have had contact with a nomadic pig herd (OR 6.1, 95% CI 1.3–27.8) [16,17]. Bats frequently visited date palm trees and licked shaved surfaces of the trees to drink sap at night [18]. Date palm sap spoiled by bat feces is occasionally fed to cattle in Bangladesh [19]. Domestic animal infection with NiV may represent an immediate risk to human infection as well as a risk for further evolution of the virus for adaptation to mammals other than bats. We conducted a cross-sectional study to look for evidence of NiV antibodies in domestic livestock, including cattle, goats and pigs, and to identify exposures associated with NiV antibodies.

## Materials and Methods

### Ethical statement

Field staff obtained written consent from the animal owners for data and sample collection. icddr, b's Research Review Committee, Ethical Review Committee and Animal Experimentation

## Author Summary

Nipah virus (NiV), is an emerging disease that causes severe encephalitis and respiratory illness in humans. Pigs were identified as an intermediate host for NiV transmission in Malaysia, and in Bangladesh three NiV outbreak investigations since 2001 identified an epidemiological association between close contact with sick or dead animals and human illness. We collected samples from cattle and goats reared around *Pteropus* bat roosts in human NiV outbreak areas in Bangladesh, and tested pig sera collected for a Japanese encephalitis study. We detected antibodies against NiV glycoprotein in 26 (6.5%) cattle, 17 (4.3%) goats and 138 (44.2%) pigs by a Luminex-based multiplexed microsphere assay, but none were virus neutralizing. There may have been exposure of Luminex positive animals to one or more novel viruses with antigenic similarity to NiV. Further research may identify a novel organism of public health importance.

Ethics Committee reviewed and approved the study protocols. The protocol numbers are PR-10015 for the henipavirus study and 2008–063 for the Japanese encephalitis study.

## Study site

For assessing NiV exposure in cattle and goats, we selected Faridpur, Rajbari, Meherpur, Tangail and Naogaon districts as study sites because they had previous human NiV outbreaks. We identified the nearest *Pteropus* bat roost from the human index case's household for each of the five sites. We enrolled cattle and goats living within a 1000 meter radius of the fruit bat roost in each site. If an insufficient number of cattle and goats were identified, we extended this area up to 5000 meters in increments of 1000 meters. We enrolled the pig samples from a population based survey done in pigs in 3 adjacent Northwestern districts (Naogaon, Rajshahi and Nawabganj) of Bangladesh during May–September 2009 as part of a separate study on Japanese encephalitis [20]. Those three districts were chosen for pig sampling because of higher number of Japanese encephalitis cases reported from these areas [21].

## Animal enrollment

For cattle and goat enrollment, we generated random latitude/longitude coordinates within a 1000 meter radius of each of the five selected *Pteropus* bat roosts using global positioning system (GPS) coordinates. From each GPS location, we identified the nearest household. For selecting subsequent households, we chose the nearest front door of every second household. We enrolled a maximum of three animals, either cattle or goats or both, that were either healthy or sick from each household. We selected animals aged >2 months or when they were weaned from the dam's milk and could feed on grass or other foods in the environment that may be contaminated with henipaviruses. For pig specimens the study team conducted a census of the pig population at Naogaon, Rajshahi and Nawabganj districts relying on the pig raisers' social network [22]. The primary objective of the pig sampling was a separate study exploring prevalence of infection with Japanese encephalitis virus, and as a result the field team did not collect the same information on fruit bat exposure as was collected for cattle and goats. Field workers visited the areas to collect data on demographics and management of pigs and sampled 312 pigs. The study team selected pigs over 6 months of age for sample collection because of their exposure to Japanese encephalitis virus for longer period.

## Data collection

Field staff interviewed animal owners to collect information on their animal characteristics, management, ecological and environmental data using a structured questionnaire. The management data included rearing systems and feeding practices. We categorized feeding practices for cattle and goats as intensive (animals are kept in pens and supplied feed entirely from outside), semi-intensive (sometimes grazing and sometimes supplied feed in pens) and extensive (only grazing without supplementation). For pigs, field staff collected rearing system data on two categories including backyard (pigs were allowed to graze in the nearby pasture) and nomadic (pigs were allowed to move from one area to another for scavenging feed).

## Sample collection and laboratory testing

We collected five to eight ml of blood for preparing serum from each selected cattle, goat or pig using aseptic sterile equipment. All

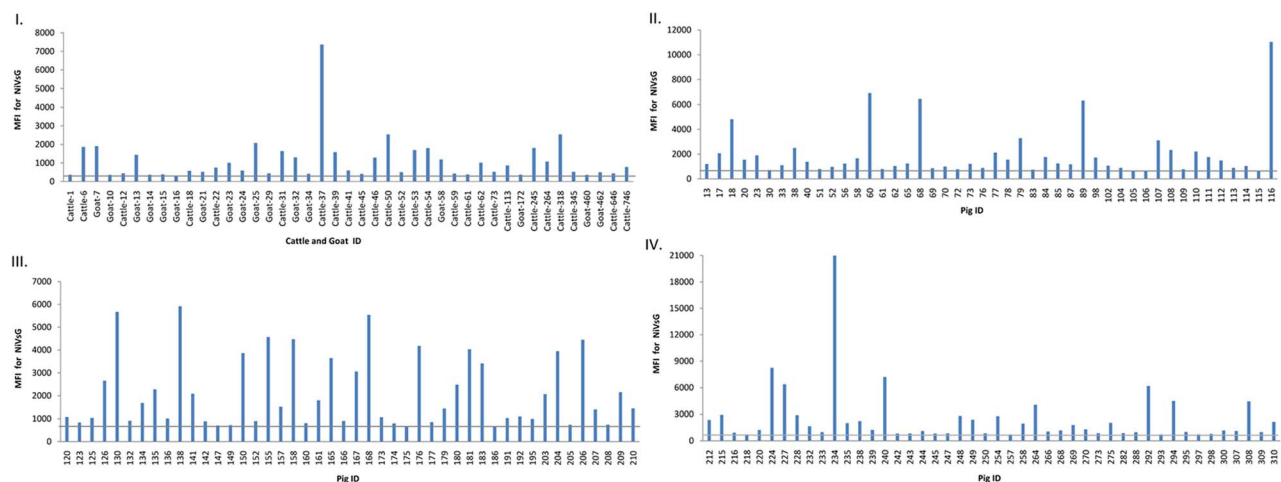

**Figure 1. Detection of NiVg antibodies in Luminex based multiplexed microsphere assay.** The median fluorescent intensities (MFI) for each microsphere population are shown in graphs. MFI for antibody positive cattle and goat shown in graph I. MFI for antibody positive pig sera is shown in graph II, III and IV. The gray bar represents the detection cut-off of 300 MFI for cattle and goat sera and 650 MFI for pig sera. doi:10.1371/journal.pntd.0003302.g001

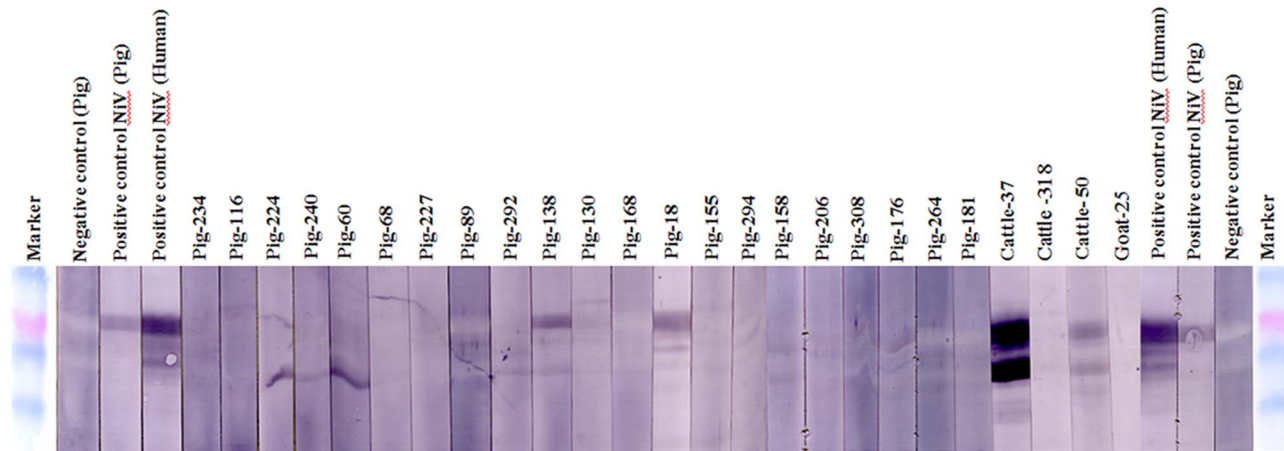

**Figure 2. Western blot analysis against NiV N (nucleocapsid) protein of cattle, goat and pig sera showing higher MFI.** The marker is BenchMark Pre-stained Protein Ladder (Invitrogen); the positive sera (NiV virus neutralization test positive pig and human field sera); the negative control sera (NiV virus neutralization test negative pig). doi:10.1371/journal.pntd.0003302.g002

animal sera were tested at the Australian Animal Health Laboratory (AAHL) using a Luminex-based multiplexed microsphere assay that specifically detects antibodies to the soluble attachment glycoproteins (sG) of henipaviruses (NiV and Hendra virus (HeV)) [23]. Beads coated with either NiVsG or HeV sG were mixed with sera at a dilution of 1:100. Biotinylated Protein A/G and Streptavidin-PE were then used to detect bound antibody. Beads were interrogated by lasers in a BioRad BioPlex machine and the results recorded as the Median Fluorescent Intensity (MFI) of 100 beads. Bayesian mixture models were used to characterize the bimodal distribution of microsphere assay outputs to classify individuals as seropositive or seronegative, following methods described in Peel et al. [24]. In contrast to Peel et al (2013), where similar results were obtained whether mixture models were fitted to data from different age groups within the one species simultaneously or independently, for the data from different species described here, optimal fitting was observed when each species was fitted independently. Conservative species-specific cutoffs were determined so that individuals with MFI values above this cutoff were >99% likely to be seropositive (MFI = 300 for cattle and goats and MFI = 650 for pigs). Full details of the method, assumptions and results are provided in the Supporting Information to this manuscript. Cattle, goat and pig sera showing higher MFI values were further analyzed by western blot (WB), enzyme-linked immunosorbent assay (ELISA) and serum neutralization test (SNT). The WB test was used to detect non-neutralizing antibodies against recombinant N protein of henipaviruses [25]. A subset of NiVsG positive sera were also tested against Cedar virus (CedV) sG in the Luminex assay. Laboratory personnel at the Viral Special Pathogens Branch, Centers for Disease Control and Prevention tested all NiVsG

positive sera, along with a randomly selected subset of negative sera using their in-house enzyme-linked immunosorbent assay (ELISA). Gamma-irradiated lysates from NiV-infected and mock-infected Vero E6 cells were used as antigens and Protein A/G used for detection of bound antibodies [26]. SNT was performed at AAHL under biosafety level (BSL) 4 conditions. Briefly, sera diluted 1:10 was mixed with 200 TCID<sub>50</sub> NiV in 96-well tissue culture plates, incubated for 30 minutes at 37°C and 100 ul containing  $2 \times 10^4$  vero cells in suspension added. The cells were incubated for 3 days and then observed for viral CPE.

### Statistical analysis

We calculated the prevalence of antibodies separately for cattle, goats and pigs by dividing Luminex-positive animals by the total number of animals of that species tested. We calculated the prevalence ratio (PR) to identify the association between Luminex results and exposure variables by bivariate analysis. Before examining the independence of multiple explanatory variables, we framed a causal diagram to identify causal associations between variables of interest and to identify confounders as described [27,28]. Exposure variables having a prevalence ratio >1 in bivariate analysis and selected variables from the causal diagram were entered to construct the final model of multivariate logistic regression analysis. We adjusted all confidence limits for geographical clustering in both bivariate and multivariate logistic regression model to minimize clustering effect during animal enrollment. Based on geographical position of enrolled households, district wise cluster was formed with unique code. Confounding variables were also entered in the multivariate logistic regression model for adjustment during analysis. All statistical analysis was done by using STATA 10.0.

**Table 1. NiVsG seropositive animals as detected by Luminex assay.**

| Species | Number of animals tested | Number NiVsG positive (%) |
|---------|--------------------------|---------------------------|
| Cattle  | 400                      | 26 (6.5)                  |
| Goat    | 400                      | 17 (4.3)                  |
| Pig     | 312                      | 138 (44.2)                |

doi:10.1371/journal.pntd.0003302.t001

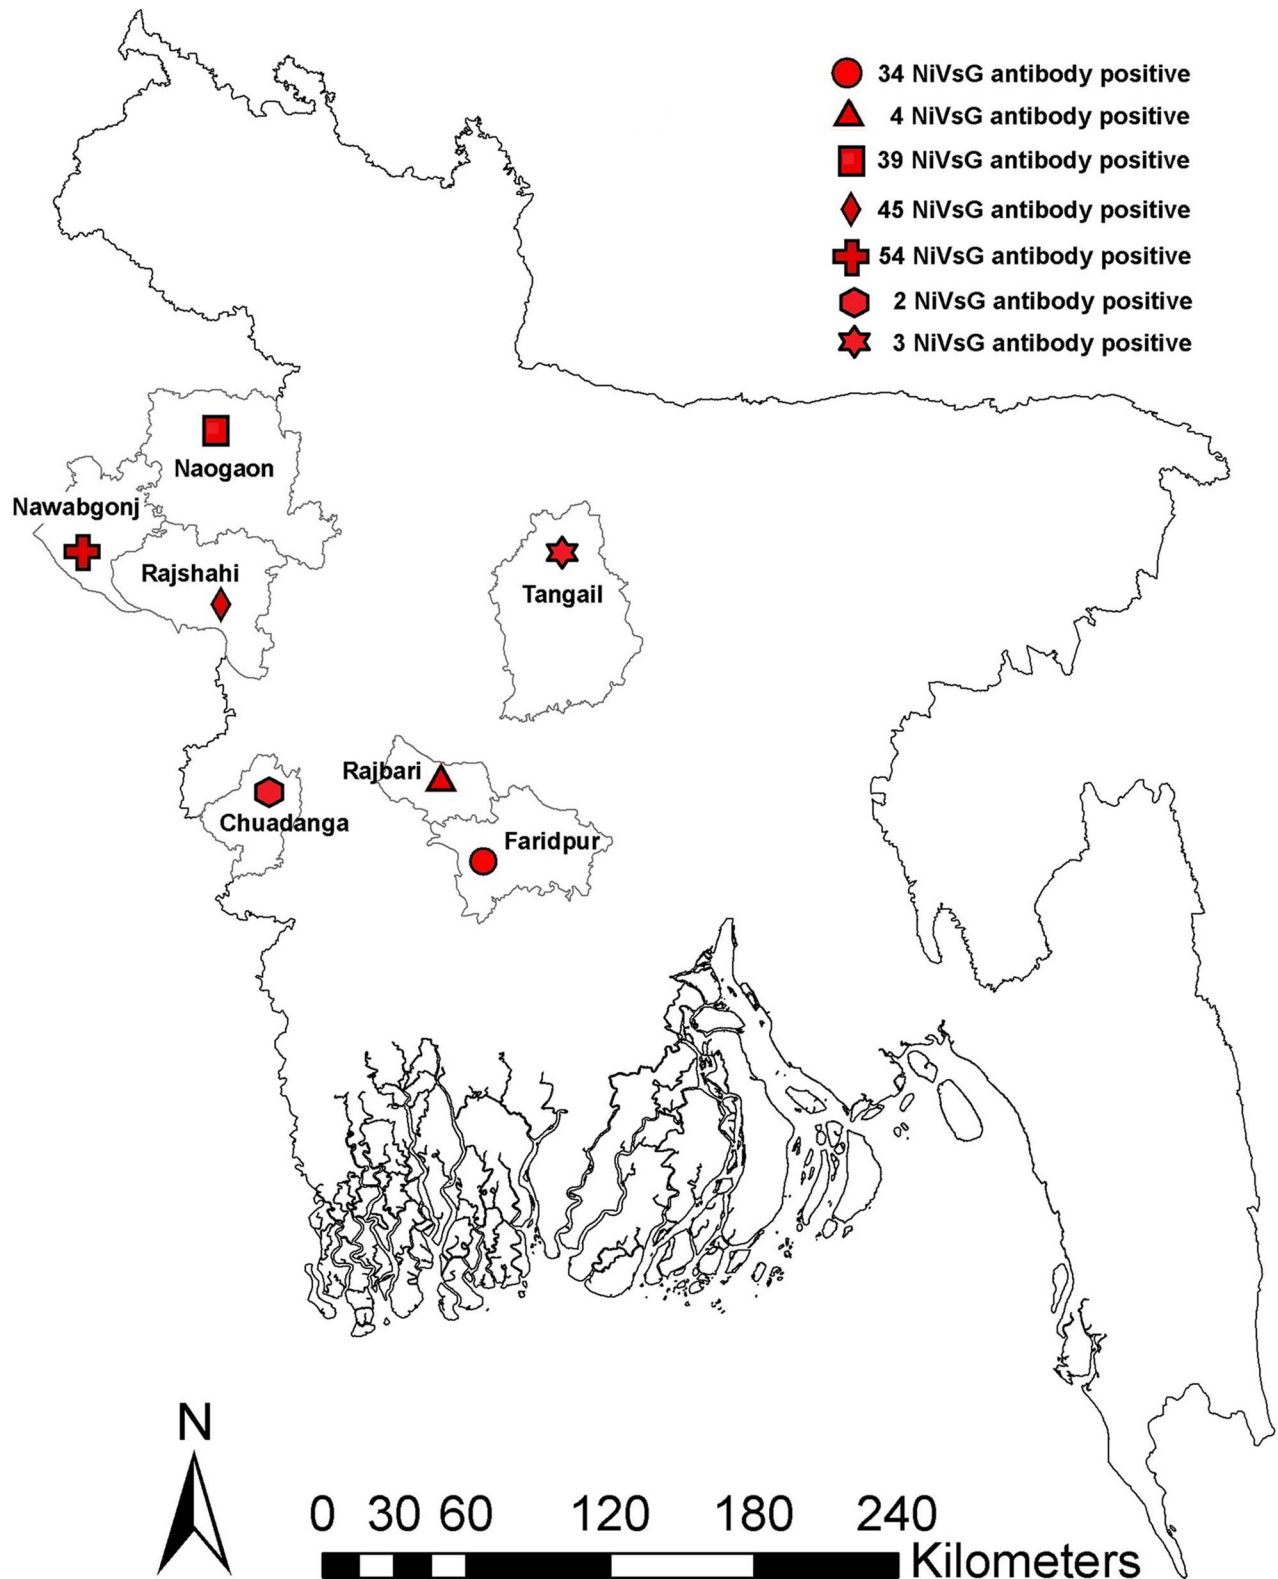

**Figure 3. Distribution of NiVsG antibody positive animals in seven districts of Bangladesh.**  
 doi:10.1371/journal.pntd.0003302.g003

**Table 2.** NiVsG seropositive animals by district in Bangladesh.

| Area (District) | Number of animals tested |      |     | Number NiVsG positive (%) |
|-----------------|--------------------------|------|-----|---------------------------|
|                 | Cattle                   | Goat | Pig |                           |
| Faridpur        | 80                       | 80   | 0   | 34 (21.3)                 |
| Rajbari         | 80                       | 80   | 0   | 4 (2.5)                   |
| Tangail         | 80                       | 80   | 0   | 3 (1.9)                   |
| Chuadanga       | 80                       | 80   | 0   | 2 (1.3)                   |
| Naogaon         | 80                       | 80   | 109 | 39 (14.5)                 |
| Rajshahi        | 0                        | 0    | 100 | 45 (45)                   |
| Nawabganj       | 0                        | 0    | 103 | 54 (52.4)                 |

doi:10.1371/journal.pntd.0003302.t002

## Results

### Demographic characteristics

We enrolled 400 cattle, 400 goats and 312 pigs between May 2009 and January 2011. Among all enrolled cattle and goats, 798 (99%) were reared in backyard farms, 587 (73%) cattle and goats were fed using semi-intensive practices, 150 (19%) were fed using intensive practices, and 63 (8%) were fed using extensive practices. The median age of sampled cattle was 33 months; 67% were female and 46% were a local breed. The mean age of sampled goats was 21 months; 69% were female and 94% were Black Bengal breed. The study team identified 5,450 households rearing a total of 11,364 pigs throughout Rajshahi (34%), Nawabganj (13%) and Naogaon (53%)

districts. More than 60% (n = 6,963) of pigs were over 12 months of age and half of the total pig population were female. Of the 312 sampled pigs, 49% were female and all were a local breed. The mean age of sampled pigs was 23 months (range 5–60).

### Serological analysis

Of the tested animals, 26 cattle (6.5%, 95% CI 4.3–9.4), 17 goats (4.3%, 95% CI 2.5–6.7) and 138 pigs (44.2%, 95% CI 38.6–49.9) had antibodies against NiV soluble attachment glycoproteins (NiVsG) in the Luminex assay (Table 1). The NiVsG positive sera had a range of MFI values between 306 and 20,975 (Figure 1). A total of 39 NiVsG positive sera (9cattle, 2 goats and 28 pigs) showing the highest MFI in Luminex assay were further tested by

**Table 3.** Demographic characteristics of NiVsG seropositive and seronegative cattle, goats and pigs in Bangladesh.

| Cattle                 | NiVsG positives (N = 26)  | NiVsG negatives (N = 374) |
|------------------------|---------------------------|---------------------------|
| Mean age in month (SD) | 32.3 (20)                 | 32.8 (32)                 |
| <b>Sex, no. (%)</b>    |                           |                           |
| Female                 | 24 (92)                   | 242 (65)                  |
| Male                   | 2 (8)                     | 132 (35)                  |
| <b>Breed, no. (%)</b>  |                           |                           |
| Local (indigenous)     | 19 (73)                   | 166 (44)                  |
| Crossbred              | 7 (27)                    | 208 (56)                  |
| Goat                   | NiVsG positives (N = 17)  | NiVsG negatives (N = 383) |
| Mean age in month (SD) | 27.2 (12.8)               | 21 (18.2)                 |
| <b>Sex, no. (%)</b>    |                           |                           |
| Female                 | 16 (94)                   | 260 (68)                  |
| Male                   | 1 (6)                     | 123 (32)                  |
| <b>Breed, no. (%)</b>  |                           |                           |
| Black Bengal           | 16 (94)                   | 359 (94)                  |
| Jamunapari             | 1 (6)                     | 18 (5)                    |
| Crossbred              | 0                         | 6 (1)                     |
| Pig                    | NiVsG positives (N = 138) | NiVsG negatives (N = 174) |
| Mean age in month (SD) | 22.3 (10.8)               | 23.3 (10.4)               |
| <b>Sex, no. (%)</b>    |                           |                           |
| Female                 | 68 (49)                   | 85 (49)                   |
| Male                   | 70 (51)                   | 89 (51)                   |
| <b>Breed, no. (%)</b>  |                           |                           |
| Native                 | 138 (100)                 | 174 (100)                 |

doi:10.1371/journal.pntd.0003302.t003



**Table 4.** Bivariate analysis of feeding practices and environmental exposures associated with NiV serology results in cattle and goats.

| Variables                                                                                   | NiVsG positives<br>(N = 43) | NiVsG negatives<br>(N = 757) | PR* (95% CI)   | P      |
|---------------------------------------------------------------------------------------------|-----------------------------|------------------------------|----------------|--------|
| <b>Feeding exposures, no. (%)</b>                                                           |                             |                              |                |        |
| Feeding of partially bat and/or bird eaten fruits                                           | 25 (58)                     | 187 (25)                     | 3.9 (2–7.2)    | <0.001 |
| Drinking of raw palmyra palm juice                                                          | 7 (16)                      | 9 (1)                        | 9.5 (5.2–17.4) | <0.001 |
| <b>Feeding system, no (%)</b>                                                               |                             |                              |                |        |
| Intensive                                                                                   | 0                           | 63 (8)                       |                |        |
| Semi-intensive and extensive                                                                | 43 (100)                    | 694 (92)                     | undefined      | <0.001 |
| <b>Environmental exposures</b>                                                              |                             |                              |                |        |
| Roaming pig herds within one km radius area from animal household in last one year, no. (%) | 39 (91)                     | 645 (85)                     | 1.7 (0.6–4.3)  | 0.3    |
| Fruit orchards within one km radius area from animal household, no. (%)                     | 20 (47)                     | 250 (33)                     | 1.7 (0.8–3.8)  | 0.2    |
| Mean distance in meters between animal household and bat roost (SD)                         | 381 (256.2)                 | 475.1 (296.2)                | -              | -      |

\*prevalence ratio.

doi:10.1371/journal.pntd.0003302.t004

serum neutralization test against NiV. No neutralizing antibodies were detected. We also tested NiVsG positive sera from 3 cattle, 1 goat and 21 pig sera that reacted most strongly in Luminex assay by western blot. Antibodies against NiV N protein were detected in two cattle sera, one with an MFI value of 7365 and one with an MFI of 2537 and two pig sera (Figure 2). NiVsG positive sera along with 140 NiVsG negative sera (9 cattle, 13 goats and 118 pigs) were tested for NiV antibodies using CDC's in-house ELISA. All specimens were negative for NiV antibodies by ELISA. A total of 25 NiVsG positive sera were tested for CedV antibodies in the Luminex assay. None showed significant binding for CedV.

We identified NiV Luminex antibody positive animals from all study sites (Table 2 and Figure 3). The majority of NiV antibody positive cattle (92%) and goats (94%) were female (Table 3). During sample collection, 99% of animals were observed to be apparently healthy and all antibody positive animals had no apparent clinical signs of illness.

### Animal management practices and environmental exposures

In bivariate analyses, cattle and goats with NiVsG antibody levels above the chosen cutoffs were more likely to have a history of being fed partially bat and/or bird eaten-fruits (PR = 3.9, 95% CI 2–7.2,  $p < 0.001$ ), drinking raw juice prepared from bat and/or bird-eaten Asian Palmyra palm fruits (*Borassus flabellifer*) (PR = 9.5, 95% CI 5.2–17.4,  $p < 0.001$ ), grazing in areas exposed

to roaming pig herds (PR = 1.7, 95% CI 0.6–4.3,  $p = 0.3$ ), and living in fruit orchard areas (PR = 1.7, 95% CI 0.8–3.8,  $p = 0.2$ ) (Table 4). However, in multivariate analysis the two exposures that were independently associated were having a history of feeding on fruits partially eaten by bats or birds (PR = 3.1, 95% CI 1.6–5.7,  $p = 0.001$ ) and drinking of raw palmyra palm juice (PR = 3.9, 95% CI 1.5–10.2,  $p = 0.004$ ) (Table 5). Out of 800 cattle and goats, 2% ( $n = 16$ ) of animals were fed juice prepared from partially bats and/or birds-eaten Asian Palmyra palm fruit by their owners. There was no significant difference in pig NiVsG seroprevalence between backyard and nomadic rearing systems (20% in backyard vs. 15% in nomadic herds,  $p = 0.4$ ).

### Discussion

This study identified antibodies against NiVsG in 26 cattle, 17 goats and 138 pigs; however these antibodies did not neutralize NiV, and did not react against NiV antigens in an ELISA, though 2 cattle and 2 pig sera reacted with NiV N protein by WB. Animals that were fed fruit that had been partially eaten by bats or birds were >3 times more likely to have antibodies against NiVsG compared with animals not fed partially eaten fruit.

The serological response in these domestic animals suggests they were likely infected with a henipavirus. The positive test results on two different diagnostic platforms targeting two different NiV proteins (sG and N), but negative SNT results and the association with bat bitten fruit suggests that the animals were likely infected

**Table 5.** Multivariate logistic regression analysis of feeding practices and environmental exposures associated with NiV serology results in cattle and goats.

| Variables                                                                          | Adjusted PR* | 95% CI   | P     |
|------------------------------------------------------------------------------------|--------------|----------|-------|
| Feeding of partially bat and/or bird eaten fruits                                  | 3.1          | 1.6–5.7  | 0.001 |
| Drinking of raw palmyra palm juice                                                 | 3.9          | 1.5–10.2 | 0.004 |
| Fruit orchards within one km radius area from animal household                     | 1.6          | 0.8–3.3  | 0.2   |
| Roaming pig herds within one km radius area from animal household in last one year | 1.9          | 0.6–6.4  | 0.29  |

\*prevalence ratio adjusted for outbreak districts, bat roost distance, feeding systems and rearing system.

doi:10.1371/journal.pntd.0003302.t005

with a non-Nipah henipavirus. Cedar virus (CedV) is the only non-Nipah non-Hendra henipavirus to have been isolated and fully described [29], yet there is evidence of considerable diversity of henipaviruses. Samples from 6 bat species in 5 different African countries identified RNA sequence of paramyxovirus L gene suggestive of 19 novel non-Nipah non-Hendra henipaviruses [30]. Three additional novel henipaviruses have been identified by sequencing nucleic acid of the paramyxovirus large gene from *Pteropus giganteus*, the putative bat reservoir of NiV in Bangladesh [31]. The virus (or viruses) detected here appear to be more closely related to NiV than HeV, as measured by cross-reactive antibodies specific for NiVsG.

Phylogenetic analysis of NiV isolates from Malaysia and Bangladesh suggest that strains of NiV transmitted from bats to humans were genetically diverse, however all isolated viruses from animals and humans in these two countries show full cross-neutralizing antibodies [32–34]. While studies on African bats have showed antigen-antibody reactions to henipaviruses in the Luminex assay, and cross-neutralization of HeV and NiV in serum neutralization tests [35,36], studies in Vietnam on bats and in Ghana on pigs showed similar types of antigen-antibody reactions of henipaviruses in the Luminex assay without cross neutralization, similar to what we identified in domestic animals in Bangladesh [37,38]. Cedar virus, detected in Australian fruit bats, is also not cross-neutralizing with HeV or NiV and has limited cross-reactivity in the Luminex sG binding assays [29]. Finally, in India some individual *Pteropus* bats have shown antibodies that cross-neutralized Nipah and Hendra virus [39]. Taken together these observations suggests that there is a spectrum of henipavirus strains circulating, with differing levels of antibody cross-reactivity. Challenges associated with assessing serological responses to an uncharacterized virus were mitigated here by using a Bayesian mixture model approach, which enables the assay output to be assessed in its own right, without the need to compare it to an alternative assay [24]. These analyses strongly supported cutoffs of MFI = 300 for cattle and goats and MFI = 650 for pigs as being very conservative (individuals >99% likely to be seropositive) (Details in the supporting material). Fruit bats can contaminate fruits, grasses or other plants with henipaviruses through their excretions and secretions. Epidemiological findings from multiple HeV outbreaks in Australia suggested that the horse index cases were likely to have been exposed via feeding in paddocks containing fruit trees frequented by fruit bats and thereby contaminated with HeV [40]. In our study, animal owners reared animals mainly in the backyard ( $\approx$ 99%) and 73% of these animals were fed with a semi-intensive feeding system. Pteropid bats visit fruit trees as part of their nightly foraging activities, and sometimes drop partially eaten fruits to the ground [41,42]. Nipah virus RNA has been detected from urine and throat swab samples collected from *P. giganteus* in Bangladesh [31] from fruit partially eaten by *P. hypomelanus* and *P. vampyrus* in Malaysia [41]. As the domestic animals in this study were scavenging for a portion of their daily feeding time, they could have been exposed to dropped fruits or an environment contaminated with bat excreta, which might increase the risk of henipa-like virus transmission from bats to these animals.

In this study, animal owners reported that sometimes they offered dropped fruits as foods to their animals. A few animal owners also reported that they prepared fresh juice from intact Asian Palmyra palm fruit for themselves and they used Palmyra palm fruits partially eaten by bats and/or birds for their animals. The association between exposure to bat-contaminated feeding exposure and presence of antibodies detected by Luminex assay against NiVsG proteins in livestock animals suggests that *P. giganteus* bats, the reservoir species of NiV, or a related

frugivorous bat species such as *Cynopterus sphinx* or *Rousettus leischenaulti* – both common in Bangladesh and observed to have similar foraging patterns with *P. giganteus* [43], could be the source of infection that resulted in the generation of these antibodies.

Henipaviruses can infect a wide variety of animal species including humans [4,44–48]. This is consistent with the ability of the virus to infect a wide range of mammals by exploiting the very well conserved ephrin B2 and ephrin B3 receptor [49–51]. In Malaysia, antibodies against NiV were detected in goats, dogs, cats and horses during a human Nipah outbreak that suggests a wide range of animal species were exposed and infected with NiV [44–46]. Pigs were identified as the most frequently infected domestic animal hosts and they transmitted infection from bats to humans as an intermediate host [4,5]. In this study, our data also suggest pigs were more likely to be exposed to henipaviruses than cattle and goats. The high rate of seropositivity in pigs could be due to the frequent exposure and/or their high susceptibility to henipavirus infection. Alternatively, this may represent a henipavirus that has adapted to and developed a reservoir in swine. Swine in Malaysia and in Ghana have evidence of susceptibility to henipavirus infection [5,38]. We don't know whether other henipaviruses are infecting human populations, but further investigation in bats, domestic animals and people may further clarify henipavirus ecology in Bangladesh and globally.

This serological study of healthy animals provides little insight on the clinical consequences of these infections. All antibody positive animals were apparently healthy during sample collection, but they may have had signs of disease earlier. Moreover, animals with severe illness may have died before sampling. Further studies in sick animals would be necessary to evaluate the association of these non-Nipah henipaviruses with illness.

Laboratory findings suggest cattle, goats and pigs were exposed to a novel virus or viruses with antigenic similarity to NiV. The association of antibody positive findings by Luminex assay in cattle and goats with exposures to potentially bat-contaminated foods suggests that the source of this virus is likely frugivorous bats. Further research should be undertaken to characterize the range of henipaviruses spilling over from bats to domestic animals because of their potential animal health and human health importance.

## Supporting Information

**Supporting Information S1** Analysis of NiV serological data from domestic species in Bangladesh using Bayesian mixture models.

(PDF)

**Supporting Information S2** Questionnaire for serological evidence of henipavirus exposure in cattle and goats.

(PDF)

**Supporting Information S3** Datasheet 1.

(XLS)

**Supporting Information S4** Datasheet 2.

(XLS)

## Acknowledgments

icddr, b is thankful to the Governments of Australia, Bangladesh, Canada, Sweden and the UK for providing core or unrestricted support. We express our gratitude to Australian Animal Health Laboratory (AAHL) and Viral Special Pathogen Branch, CDC, USA for providing laboratory support. We are grateful to Dorothy Southern and Carrie Read for their contribution during writing of this manuscript. We thank Kamal Hossain

and T.J. McKinley for providing support for statistical analyses. We are thankful to field staff for their efforts during sample and data collection.

## Author Contributions

Conceived and designed the experiments: SPL LFW SC MSUK. Performed the experiments: GC JB CCB. Analyzed the data: SC SUK

## References

- Chua KB, Bellini WJ, Rota PA, Harcourt BH, Tamin A, et al. (2000) Nipah virus: a recently emergent deadly paramyxovirus. *Science* 288(5470): 1432.
- Johara MY, Field H, Rashdi AM, Morrissy C, van der Heide B, et al. (2001) Nipah virus infection in bats (order Chiroptera) in peninsular Malaysia. *Emerging Infectious Disease* 7(3): 439–41.
- Field H, Young P, Yob JM, Mills J, Hall L, Mackenzie J (2001) The natural history of Hendra and Nipah viruses. *Microbes and infection* 3(4): p. 307–314.
- Chua KB (2003) Nipah virus outbreak in Malaysia. *J Clin Virol* 26(3): 26 5–75.
- Nor MNM, Gan CH, Ong BL(2000) Nipah virus infection of pigs in peninsular Malaysia. *Revue Scientifique et Technique-Office International des Epizooties* 19(1): p. 160–165.
- Chua KB, Chua BH, Wang CW (2002) Anthropogenic deforestation, El Niño and the emergence of Nipah virus in Malaysia. *The Malaysian journal of pathology* 24(1): 15.
- Parashar UD, Sunit LM, Ong F, Mounts AW, Arif MT, et al. (2000) Case-control study of risk factors for human infection with a new zoonotic paramyxovirus, Nipah virus, during a 1998–1999 outbreak of severe encephalitis in Malaysia. *Journal of infectious diseases* 181(5): p. 1755–1759.
- Hsu VP, Hossain MJ, Parashar UD, Ali MM, Ksiazek TG, et al. (2004) Nipah virus encephalitis reemergence, Bangladesh. *Emerging Infectious Diseases* 10(12): p. 2082–2087.
- Gurley ES, Montgomery JM, Hossain MJ, Bell M, Azad AK, et al. (2007) Person-to-person transmission of Nipah virus in a Bangladeshi community. *Emerging Infectious Diseases* 13(7): p. 1031–1037.
- Luby SP, Rahman M, Hossain MJ, Blum LS, Husain MM, et al. (2006) Foodborne transmission of Nipah virus, Bangladesh. *Emerging Infectious Diseases* 12(12): p. 1888.
- Montgomery JM, Hossain MJ, Gurley E, Carroll DS, Croisier A, et al. (2008) Risk factors for Nipah virus encephalitis in Bangladesh. *Emerging Infectious Diseases* 14(10): p. 1526.
- International Centre for Diarrheal Disease Research, Bangladesh (2008) Outbreaks of Nipah virus in Rajbari and Manikgonj, February 2008. *Health and Science Bulletin* 6(1): p. 12–13.
- International Centre for Diarrheal Disease Research, Bangladesh (2010) Nipah outbreak in Faridpur District, Bangladesh, 2010. *Health and Science Bulletin* 8(2): p. 6–11.
- International Centre for Diarrheal Disease Research, Bangladesh (2011) Nipah outbreak in Lalmonirhat district, 2011. *Health and Science Bulletin* 9(2): p. 14–18.
- Institute of Epidemiology, Disease Control and Research. Nipah Virus Outbreak. <http://www.icdr.org/>.
- International Centre for Diarrheal Disease Research, Bangladesh (2003) Outbreaks of encephalitis due to Nipah/Hendra-like viruses. *Western Bangladesh. Health and Science Bulletin* 1 (5): p. 1–6.
- Luby SP, Gurley ES, Hossain MJ (2009) Transmission of Human Infection with Nipah Virus. *Clinical Infectious Diseases* 49(1): p. 1743–1748.
- Khan MSU, Hossain J, Gurley ES, Nahar N, Sultana R, et al. (2010) Use of infrared camera to understand bats' access to date palm sap: implications for preventing Nipah virus transmission. *Ecohealth* 7(4): p. 517–525.
- Nahar N, Sultana R, Gurley ES, Hossain MJ, Luby SP (2010) Date palm sap collection: exploring opportunities to prevent Nipah transmission. *Ecohealth* 7(2): p. 196–203.
- Khan SU, Salje H, Hannan A, Islam MA, Bhuyan AM, Islam MA, et al. (2014) Dynamics of Japanese Encephalitis Virus Transmission among Pigs in Northwest Bangladesh and the Potential Impact of Pig Vaccination. *PLoS neglected tropical diseases* 8(9): e3166.
- Paul RC, Rahman M, Gurley ES, Jahangir HM, Diorditsa S, et al. (2011) A novel low-cost approach to estimate the incidence of Japanese encephalitis in the catchment area of three hospitals in Bangladesh. *American Journal of Tropical Medicine and Hygiene* 85(2): 379.
- Nahar N, Uddin M, Sarkar RA, Gurley ES, Khan MSU, et al. (2013) Exploring pig raising in Bangladesh: implications for public health interventions. *Veterinaria italiana* 49(1): 7–17.
- Bossart KN, McEachern JA, Hickey AC, Choudhry V, Dimitrov DS, et al. (2007) Neutralization assays for differential henipavirus serology using Bio-Plex Protein Array Systems. *Journal of virological methods* 142(1–2): p. 29–40.
- Peel AJ, McKinley TJ, Baker KS, Barr JA, Cramer G, et al. (2013) Use of cross-reactive serological assays for detecting novel pathogens in wildlife: Assessing an appropriate cutoff for henipavirus assays in African bats. *Journal of virological methods* 193(2): 295–303.
- Eshaghi M, Tan WS, Ong ST, Yusoff K (2005) Purification and characterization of Nipah virus nucleocapsid protein produced in insect cells. *Journal of clinical microbiology* 43(7): p. 3172–3177.
- Daniels P, Ksiazek T, Eaton BT (2001) Laboratory diagnosis of Nipah and Hendra virus infections. *Microbes and infection* 3(4): p. 289–295.
- Greenland S, Pearl J, Robins JM (1999) Causal diagrams for epidemiologic research. *Epidemiology* 10(1): 37–48.
- Jupiter DC (2014) Causal Diagrams and Multivariate Analysis I: A Quiver Full of Arrows. *The Journal of Foot and Ankle Surgery*. DOI: 10.1053/j.jfas.2014.05.002.
- Marsh GA, de Jong C, Barr JA, Tachedjian M, Smith C, et al. (2012) Cedar virus: a novel henipavirus isolated from Australian bats. *PLoS pathogens* 8(8): p. e1002836.
- Drexler JF, Corman VM, Müller MA, Maganga GD, Vallo P, et al. (2014) Bats host major mammalian *paramyxoviruses*. *Nature communications* 3: p. 796.
- Anthony SJ, Epstein JH, Murray KA, Navarrete-Macias I, Zambrana-Torrel CM, et al. (2013) A Strategy to Estimate Unknown Viral Diversity in Mammals. *mBio* 4(5).
- Harcourt BH, Lowe L, Tamin A, Liu X, Bankamp B, et al. (2005) Genetic characterization of Nipah virus, Bangladesh, 2004. *Emerging infectious diseases* 11(10): p. 1594–1597.
- Zhu Z, Dimitrov AS, Bossart KN, Cramer G, Bishop KA, et al. (2006) Potent neutralization of Hendra and Nipah viruses by human monoclonal antibodies. *Journal of virology* 80(2): p. 891–899.
- Lo MK, Lowe L, Hummel KB, Sazzad HMS, Gurley ES, et al. (2012) Characterization of Nipah virus from outbreaks in Bangladesh, 2008–2010. *Emerging infectious diseases* 18(2): p. 248.
- Hayman DTS, Suu-Ire R, Breed AC, McEachern JA, Wang L, et al. (2008) Evidence of henipavirus infection in West African fruit bats. *PLoS one* 3(7): e2739.
- Peel AJ, Sargan DR, Baker KS, Hayman DTS, Barr JA, et al. (2013) Continent-wide panmixia of an African fruit bat facilitates transmission of potentially zoonotic viruses. *Nature communications* 4: 2770
- Hasebe F, Thuy NT, Inoue S, Yu F, Kaku Y, et al. (2012) Serologic evidence of nipah virus infection in bats, Vietnam. *Emerging infectious diseases* 18(3): p. 536.
- Hayman DTS, Wang LF, Barr J, Baker KS, Suu-Ire R, et al. (2011) Antibodies to henipavirus or henipa-like viruses in domestic pigs in Ghana, West Africa. *PLoS one* 6(9): p. e25256.
- Epstein JH, Prakash V, Smith CS, Daszak P, McLaughlin AB, et al. (2008) Henipavirus infection in fruit bats (*Pteropus giganteus*), India. *Emerging infectious diseases* 14(8): p. 1309.
- Field HE, Barratt PC, Hughes RJ, Sullivan ND (2000) A fatal case of Hendra virus infection in a horse in north Queensland: clinical and epidemiological features. *Australian veterinary journal* 78(4): p. 279–280.
- Chua KB, Lek Koh C, Hooi PS, Wee KF, Khong JH, et al. (2002) Isolation of Nipah virus from Malaysian Island flying-foxes. *Microbes and infection* 4(2): p. 145–151.
- Sudhakaran MR, Doss PS (2012) Food and foraging preferences of three pteropodid bats in southern India. *J Threat Taxa* 4: p. 2295–2303.
- Bates RJ, DL . Harrison (1997) Sub-Order: MEGACHIROPTERA: Family Pteropodidae: Old World Fruit Bats. *Bats of the Indian Subcontinent*. Harrison Zoological Museum pp.13–15.
- Mills JN, Alim ANM, Bunning ML, Lee OB, Wagoner KD, et al. (2009) Nipah Virus Infection in Dogs, Malaysia, 1999. *Emerging Infectious Diseases* 15(6): p. 950.
- Mohd NMN, Idris AB, Lee OB (2000) Case study on Nipah virus. *Animal Health in Australia: Securing Our Future*, Canberra, Australia. [http://www.aahc.com.au/services/conference/powerpoint/azahar\\_idris.pdf](http://www.aahc.com.au/services/conference/powerpoint/azahar_idris.pdf)
- Mohd NMN (1999) Emergency report to the OIE. *Weekly Disease Information* 12 (20). <http://agrolink.moa.my/jph/dvs/nipah/oie990528.html>.
- Field H, Kung N (2011) Henipaviruses-unanswered questions of lethal zoonoses. *Current Opinion in Virology* 1: . p658–661.
- Geisbert T.W., H . Feldmann, C.C . Broder (2012) Animal challenge models of henipavirus infection and pathogenesis. Springer. p. 153–177.
- Bonaparte MI, Dimitrov AS, Bossart KN, Cramer G, Mungall BA, et al. (2005) Ephrin-B2 ligand is a functional receptor for Hendra virus and Nipah virus. *Proceedings of the National Academy of Sciences of the United States of America* 102(30): p. 10652–10657.
- Negrete OA, Levroney EL, Aguilar HC, Bertolotti-Ciarlet A, Nazarian R, et al. (2005) EphrinB2 is the entry receptor for Nipah virus, an emergent deadly paramyxovirus. *Nature* 436(7049): p. 401–405.
- Xu K, Rajashankar KR, Chan YP, Himanen JP, Broder CC (2008) Host cell recognition by the henipaviruses: crystal structures of the Nipah G attachment glycoprotein and its complex with ephrin-B3. *Proceedings of the National Academy of Sciences* 105(29): p. 9953.
